# Supplementary material for: Detailed Phenotype Supports Pathogenicity of Hypomorphic Variant in ABCC6-Associated Pattern Dystrophy
Source: PubMed Central journal article supplement — Case Rep Ophthalmol. 2024 Jun 12;15(1):497–506. doi: 10.1159/000538045 (PMC11250126; doi:10.1159/000538045), 2024-06-12
Supplement: Supplementary_material-Suppl.1-s1.pdf [file Supplementary_material-Suppl.1-s1.pdf]

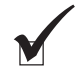

| Topic                       | Item | Checklist item description                                                                             | Reported on Line                                                    |
|-----------------------------|------|--------------------------------------------------------------------------------------------------------|---------------------------------------------------------------------|
| Title                       | 1    | The diagnosis or intervention of primary focus followed by the words “case report”                     | noted in key words                                                  |
| Key Words                   | 2    | 2 to 5 key words that identify diagnoses or interventions in this case report, including "case report" | 30                                                                  |
| Abstract<br>(no references) | 3a   | Introduction: What is unique about this case and what does it add to the scientific literature?        | 47                                                                  |
|                             | 3b   | Main symptoms and/or important clinical findings                                                       | 34-36                                                               |
|                             | 3c   | The main diagnoses, therapeutic interventions, and outcomes                                            | 37-48                                                               |
|                             | 3d   | Conclusion—What is the main “take-away” lesson(s) from this case?                                      | 49-52                                                               |
| Introduction                | 4    | One or two paragraphs summarizing why this case is unique ( <b>may include references</b> )            | 55-65                                                               |
| Patient Information         | 5a   | De-identified patient specific information.                                                            | 68                                                                  |
|                             | 5b   | Primary concerns and symptoms of the patient.                                                          | 68-70                                                               |
|                             | 5c   | Medical, family, and psycho-social history including relevant genetic information                      | 70-72                                                               |
|                             | 5d   | Relevant past interventions with outcomes                                                              | N/A                                                                 |
| Clinical Findings           | 6    | Describe significant physical examination (PE) and important clinical findings.                        | 75-78, 112                                                          |
| Timeline                    | 7    | Historical and current information from this episode of care organized as a timeline                   | 66-135                                                              |
| Diagnostic Assessment       | 8a   | Diagnostic testing (such as PE, laboratory testing, imaging, surveys).                                 | 78-110                                                              |
|                             | 8b   | Diagnostic challenges (such as access to testing, financial, or cultural)                              | 112-115                                                             |
|                             | 8c   | Diagnosis (including other diagnoses considered)                                                       | 131                                                                 |
|                             | 8d   | Prognosis (such as staging in oncology) where applicable                                               | N/A                                                                 |
| Therapeutic Intervention    | 9a   | Types of therapeutic intervention (such as pharmacologic, surgical, preventive, self-care)             | N/A                                                                 |
|                             | 9b   | Administration of therapeutic intervention (such as dosage, strength, duration)                        | N/A                                                                 |
|                             | 9c   | Changes in therapeutic intervention (with rationale)                                                   | N/A                                                                 |
| Follow-up and Outcomes      | 10a  | Clinician and patient-assessed outcomes (if available)                                                 | N/A                                                                 |
|                             | 10b  | Important follow-up diagnostic and other test results                                                  | 128-135                                                             |
|                             | 10c  | Intervention adherence and tolerability (How was this assessed?)                                       | N/A                                                                 |
|                             | 10d  | Adverse and unanticipated events                                                                       | N/A                                                                 |
| Discussion                  | 11a  | A scientific discussion of the strengths AND limitations associated with this case report              | 188-202                                                             |
|                             | 11b  | Discussion of the relevant medical literature <b>with references</b> .                                 | 138-208                                                             |
|                             | 11c  | The scientific rationale for any conclusions (including assessment of possible causes)                 | 178-186                                                             |
|                             | 11d  | The primary “take-away” lessons of this case report (without references) in a one paragraph conclusion | 211-221                                                             |
| Patient Perspective         | 12   | The patient should share their perspective in one to two paragraphs on the treatment(s) they received  | N/A                                                                 |
| Informed Consent            | 13   | Did the patient give informed consent? Please provide if requested                                     | Yes <input checked="" type="checkbox"/> No <input type="checkbox"/> |
